# Supplementary material
Source: Springer Nature journal article supplement (https://www.springerprofessional.de/resource/supplementary/13638_2011_112_MOESM5_ESM.pdf/11897068)
Supplement: MOESM5 [file 11897068]

**Applied Security Techniques  
in DCA Systems**

```
graph TD; A[Applied Security Techniques in DCA Systems] --> B[Certificate Revocation and Revive]; A --> C[Private Key Refresh Protocol]; A --> D[Secure Intra-DCA Communication]; A --> E[Preventing Security Attacks]; A --> F[Integration with Security Components]; A --> G[Ad Hoc Network Monitoring];
```

**Certificate  
Revocation  
and Revive**

**Private Key  
Refresh  
Protocol**

**Secure  
Intra-DCA  
Communication**

**Preventing  
Security  
Attacks**

**Integration  
with Security  
Components**

**Ad Hoc  
Network  
Monitoring**
